# Supplementary material for: Development of multiple AI pipelines that predict neoadjuvant chemotherapy response of breast cancer using H&E‐stained tissues
Source: PubMed Central journal article supplement — J Pathol Clin Res. 2023 Mar 10;9(3):182–94. doi: 10.1002/cjp2.314 (PMC10073928; doi:10.1002/cjp2.314), 2023-03-10
Supplement: CJP2-9-182-s001.pdf [file CJP2-9-182-s001.pdf]

## Development of multiple AI pipelines that predict NAC response of breast cancer using H&E-stained tissues

B Shen *et al. J Pathol Clin Res*, <https://doi.org/10.1002/cjp2.314>

### Supplementary Tables S1–S10

**Table S1.** JBCS histopathological criteria for the assessment of therapeutic response in breast cancer (2007 version)

| Grade                | Definitions                                                                                                                            |
|----------------------|----------------------------------------------------------------------------------------------------------------------------------------|
| 0: No response       | Almost no change in cancer cells after treatment.                                                                                      |
| 1: Slight response   | 1a Mild response. Mild changes in cancer cells regardless of the extent, and/or marked changes in less than one-third of cancer cells. |
|                      | 1b Moderate response. Marked changes in one-third or more but less than two-thirds of cancer cells.                                    |
| 2: Marked response   | 2a High grade changes. Marked changes in two-thirds or more of tumor cells with apparent remaining cancer cells.                       |
|                      | 2b Extremely high grade. Marked changes approaching a complete response with only a few remaining cancer cells.                        |
| 3: Complete response | Necrosis and/or disappearance of all tumor cells, and/or the replacement of cancer cells by granulation and/or fibrosis.               |

**Table S2.** Number of ROIs for the CNN, SVM and RF models

|                              | <b>Training</b> | <b>Test</b> | <b>Total</b> |
|------------------------------|-----------------|-------------|--------------|
| <b>CNN Model</b>             |                 |             |              |
| ROIs of Cancer area          | 530,173         | 169,533     | 699,709      |
| ROIs of Non-cancer area      | 76,585          | 82,572      | 159,157      |
| Total ROIs                   | 606,758         | 252,105     | 858,863      |
| <b>SVM &amp; RF Models</b>   |                 |             |              |
| Selected ROIs of Cancer area | 3,366           | 1,545       | 4,911        |
| Nuclei                       | 1,563,586       | 952,770     | 2,516,356    |

**Table S3.** The prediction result for each ROI by CNN model

**A: Training cases (CNN)**

**Accuracy: 98.8% (95% CI: 98.8–98.8%)**

**$\kappa = 0.98$**

|       |       | Prediction |         |         |         |                           |                         |            |
|-------|-------|------------|---------|---------|---------|---------------------------|-------------------------|------------|
|       |       | RG0        | RG1     | RG2     | RG3     | Total ROIs of cancer area | ROIs of non-cancer area | Total ROIs |
| Truth | RG0   | 101,748    | 119     | 156     | 254     | 102,277                   | 14,787                  | 117,064    |
|       | RG1   | 797        | 148,993 | 718     | 2,081   | 152,589                   | 27,831                  | 180,420    |
|       | RG2   | 143        | 214     | 99,383  | 958     | 100,698                   | 16,136                  | 116,834    |
|       | RG3   | 190        | 402     | 362     | 173,655 | 173,609                   | 17,831                  | 191,440    |
|       | Total | 102,878    | 149,728 | 100,619 | 176,948 | 530,173                   | 76,585                  | 606,758    |

**B: Test cases (CNN)**

**Accuracy: 88.8% (95% CI: 88.7–89.0%)**

**$\kappa = 0.85$**

|       |       | Prediction |        |        |        |                           |                         |            |
|-------|-------|------------|--------|--------|--------|---------------------------|-------------------------|------------|
|       |       | RG0        | RG1    | RG2    | RG3    | Total ROIs of cancer area | ROIs of non-cancer area | Total ROIs |
| Truth | RG0   | 36,283     | 391    | 914    | 1,856  | 39,444                    | 11,685                  | 51,129     |
|       | RG1   | 1,817      | 31,897 | 2,072  | 5,470  | 41,256                    | 32,012                  | 73,268     |
|       | RG2   | 349        | 1,617  | 22,729 | 2,601  | 27,296                    | 14,719                  | 42,015     |
|       | RG3   | 363        | 894    | 628    | 59,652 | 61,537                    | 24,156                  | 85,693     |
|       | Total | 38,812     | 34,799 | 26,343 | 69,579 | 169,533                   | 82,572                  | 252,105    |

**Table S4.** The prediction result for each ROI by the SVM model, trained by RG information only

**A: Training Cases (SVM, RG only)**

**Accuracy: 87.6% (95% CI: 86.4–88.7%)**

**$\kappa = 0.83$**

|       |       | Prediction |      |     |      |       |
|-------|-------|------------|------|-----|------|-------|
|       |       | RG0        | RG1  | RG2 | RG3  | Total |
| Truth | RG0   | 399        | 43   | 2   | 8    | 452   |
|       | RG1   | 14         | 1043 | 35  | 75   | 1167  |
|       | RG2   | 11         | 59   | 606 | 38   | 714   |
|       | RG3   | 6          | 93   | 34  | 900  | 1033  |
|       | Total | 430        | 1238 | 677 | 1021 | 3366  |

**B: Test Cases (SVM, RG only)**

**Accuracy: 72.6% (95% CI: 70.3–74.8%)**

**$\kappa = 0.60$**

|       |       | Prediction |     |     |     |       |
|-------|-------|------------|-----|-----|-----|-------|
|       |       | RG0        | RG1 | RG2 | RG3 | Total |
| Truth | RG0   | 87         | 44  | 17  | 24  | 172   |
|       | RG1   | 29         | 550 | 12  | 57  | 648   |
|       | RG2   | 16         | 75  | 142 | 44  | 277   |
|       | RG3   | 10         | 73  | 23  | 342 | 448   |
|       | Total | 142        | 742 | 194 | 467 | 1545  |

**Table S5.** The prediction result for each ROI by the SVM model, trained by RG and subtype information

A: Training Cases (SVM, RG + Subtype)

RG prediction accuracy: 89.4% (95% CI: 88.3–90.4%)

$\kappa = 0.88$

|       |       |          | Prediction |     |             |     |     |       |             |     |     |       |             |     |     |       | Total |             |
|-------|-------|----------|------------|-----|-------------|-----|-----|-------|-------------|-----|-----|-------|-------------|-----|-----|-------|-------|-------------|
|       |       |          | RG0        |     |             | RG1 |     |       |             | RG2 |     |       |             | RG3 |     |       |       |             |
|       |       |          | TN         | H+  | H+<br>HER2+ | TN  | H+  | HER2+ | H+<br>HER2+ | TN  | H+  | HER2+ | H+<br>HER2+ | TN  | H+  | HER2+ |       | H+<br>HER2+ |
| Truth | RG0   | TN       | 73         | 0   | 0           | 0   | 4   | 0     | 2           | 0   | 0   | 0     | 1           | 0   | 0   | 1     | 0     | 81          |
|       | RG0   | H+       | 0          | 290 | 0           | 0   | 28  | 0     | 3           | 1   | 5   | 0     | 0           | 0   | 0   | 4     | 5     | 336         |
|       | RG0   | H+ HER2+ | 0          | 0   | 28          | 0   | 7   | 0     | 0           | 0   | 0   | 0     | 0           | 0   | 0   | 0     | 0     | 35          |
|       | RG1   | TN       | 0          | 1   | 0           | 141 | 7   | 0     | 0           | 0   | 1   | 0     | 0           | 1   | 0   | 0     | 2     | 153         |
|       | RG1   | H+       | 0          | 4   | 0           | 0   | 687 | 0     | 0           | 0   | 0   | 0     | 0           | 0   | 5   | 0     | 3     | 699         |
|       | RG1   | HER2+    | 0          | 0   | 0           | 0   | 8   | 34    | 1           | 0   | 2   | 0     | 0           | 0   | 0   | 0     | 4     | 49          |
|       | RG1   | H+ HER2+ | 0          | 0   | 0           | 0   | 46  | 0     | 212         | 0   | 2   | 0     | 1           | 0   | 2   | 2     | 1     | 266         |
|       | RG2   | TN       | 0          | 0   | 0           | 1   | 18  | 0     | 2           | 108 | 2   | 0     | 1           | 0   | 1   | 6     | 1     | 140         |
|       | RG2   | H+       | 0          | 5   | 0           | 0   | 18  | 0     | 1           | 0   | 227 | 0     | 0           | 0   | 0   | 0     | 1     | 252         |
|       | RG2   | HER2+    | 0          | 0   | 0           | 0   | 5   | 0     | 0           | 0   | 3   | 91    | 0           | 0   | 0   | 2     | 3     | 104         |
|       | RG2   | H+ HER2+ | 0          | 0   | 0           | 1   | 22  | 0     | 1           | 0   | 1   | 0     | 185         | 0   | 5   | 3     | 0     | 218         |
|       | RG3   | TN       | 0          | 1   | 0           | 0   | 17  | 0     | 0           | 0   | 3   | 0     | 0           | 145 | 2   | 0     | 1     | 169         |
|       | RG3   | H+       | 1          | 2   | 0           | 0   | 19  | 1     | 0           | 0   | 1   | 1     | 0           | 0   | 257 | 0     | 0     | 282         |
|       | RG3   | HER2+    | 0          | 0   | 0           | 0   | 11  | 0     | 2           | 0   | 2   | 0     | 1           | 0   | 3   | 249   | 6     | 274         |
|       | RG3   | H+ HER2+ | 0          | 0   | 0           | 0   | 19  | 0     | 1           | 0   | 1   | 0     | 1           | 0   | 0   | 5     | 281   | 308         |
|       | Total |          |            | 74  | 303         | 28  | 143 | 916   | 35          | 225 | 109 | 250   | 92          | 190 | 146 | 275   | 272   | 308         |

B: Test Cases (SVM, RG + Subtype)

RG prediction accuracy: 63.7% (95% CI: 61.2–66.1%)

$\kappa = 0.58$

|       |       | Prediction |    |             |    |     |     |       |             |     |    |       |             |     |     |       |             | Total |
|-------|-------|------------|----|-------------|----|-----|-----|-------|-------------|-----|----|-------|-------------|-----|-----|-------|-------------|-------|
|       |       | RG0        |    |             |    | RG1 |     |       |             | RG2 |    |       |             | RG3 |     |       |             |       |
|       |       | TN         | H+ | H+<br>HER2+ |    | TN  | H+  | HER2+ | H+<br>HER2+ | TN  | H+ | HER2+ | H+<br>HER2+ | TN  | H+  | HER2+ | H+<br>HER2+ |       |
| Truth | RG0   | TN         | 11 | 1           | 0  | 1   | 0   | 0     | 0           | 1   | 0  | 0     | 0           | 1   | 0   | 0     | 0           | 15    |
|       | RG0   | H+         | 0  | 69          | 0  | 4   | 21  | 1     | 8           | 0   | 20 | 0     | 2           | 5   | 2   | 15    | 10          | 157   |
|       | RG0   | H+ HER2+   | 0  | 0           | 0  | 0   | 0   | 0     | 0           | 0   | 0  | 0     | 0           | 0   | 0   | 0     | 0           | 0     |
|       | RG1   | TN         | 0  | 0           | 1  | 53  | 10  | 0     | 0           | 2   | 1  | 0     | 1           | 1   | 4   | 1     | 2           | 76    |
|       | RG1   | H+         | 1  | 12          | 0  | 6   | 372 | 1     | 12          | 4   | 8  | 0     | 5           | 5   | 16  | 10    | 7           | 459   |
|       | RG1   | HER2+      | 0  | 0           | 0  | 0   | 4   | 14    | 0           | 0   | 0  | 1     | 0           | 0   | 0   | 0     | 1           | 20    |
|       | RG1   | H+ HER2+   | 3  | 4           | 0  | 2   | 16  | 2     | 48          | 3   | 0  | 0     | 0           | 0   | 0   | 3     | 12          | 93    |
|       | RG2   | TN         | 0  | 0           | 0  | 0   | 21  | 0     | 0           | 42  | 0  | 1     | 1           | 0   | 6   | 9     | 9           | 89    |
|       | RG2   | H+         | 0  | 0           | 0  | 2   | 3   | 0     | 0           | 2   | 32 | 5     | 0           | 0   | 0   | 3     | 6           | 53    |
|       | RG2   | HER2+      | 0  | 0           | 0  | 1   | 11  | 0     | 2           | 1   | 4  | 30    | 1           | 2   | 0   | 3     | 16          | 71    |
|       | RG2   | H+ HER2+   | 1  | 1           | 0  | 3   | 13  | 0     | 1           | 2   | 5  | 0     | 25          | 3   | 6   | 2     | 2           | 64    |
|       | RG3   | TN         | 0  | 1           | 0  | 0   | 20  | 0     | 0           | 0   | 4  | 1     | 0           | 90  | 15  | 4     | 0           | 135   |
|       | RG3   | H+         | 1  | 5           | 0  | 0   | 20  | 3     | 0           | 0   | 0  | 0     | 2           | 0   | 35  | 3     | 0           | 69    |
|       | RG3   | HER2+      | 1  | 0           | 0  | 3   | 3   | 0     | 1           | 4   | 0  | 0     | 4           | 1   | 0   | 61    | 0           | 78    |
|       | RG3   | H+ HER2+   | 0  | 1           | 0  | 6   | 20  | 3     | 0           | 4   | 2  | 0     | 1           | 1   | 0   | 26    | 102         | 166   |
|       | Total |            |    | 18          | 94 | 1   | 81  | 534   | 24          | 72  | 65 | 76    | 38          | 42  | 109 | 84    | 140         | 167   |

Note: In the test cases, there was no case of (RG0, H+ HER2+).

**Table S6.** The prediction result for each ROI by the RF model, trained by RG and subtype information

A: Training Cases (RF, RG + Subtype)

Accuracy: 100% (95% CI: 99.9–100%)

$\kappa = 1$

|       |       |          | Prediction |     |             |     |     |       |             |     |     |       |             |     |       |     | Total |       |             |
|-------|-------|----------|------------|-----|-------------|-----|-----|-------|-------------|-----|-----|-------|-------------|-----|-------|-----|-------|-------|-------------|
|       |       |          | RG0        |     |             | RG1 |     |       | RG2         |     |     | RG3   |             |     | Total |     |       |       |             |
|       |       |          | TN         | H+  | H+<br>HER2+ | TN  | H+  | HER2+ | H+<br>HER2+ | TN  | H+  | HER2+ | H+<br>HER2+ | TN  |       | H+  |       | HER2+ | H+<br>HER2+ |
| Truth | RG0   | TN       | 81         | 0   | 0           | 0   | 0   | 0     | 0           | 0   | 0   | 0     | 0           | 0   | 0     | 0   | 0     | 81    |             |
|       | RG0   | H+       | 0          | 336 | 0           | 0   | 0   | 0     | 0           | 0   | 0   | 0     | 0           | 0   | 0     | 0   | 0     | 0     | 336         |
|       | RG0   | H+ HER2+ | 0          | 0   | 35          | 0   | 0   | 0     | 0           | 0   | 0   | 0     | 0           | 0   | 0     | 0   | 0     | 0     | 35          |
|       | RG1   | TN       | 0          | 0   | 0           | 153 | 0   | 0     | 0           | 0   | 0   | 0     | 0           | 0   | 0     | 0   | 0     | 0     | 153         |
|       | RG1   | H+       | 0          | 0   | 0           | 0   | 699 | 0     | 0           | 0   | 0   | 0     | 0           | 0   | 0     | 0   | 0     | 0     | 699         |
|       | RG1   | HER2+    | 0          | 0   | 0           | 0   | 0   | 49    | 0           | 0   | 0   | 0     | 0           | 0   | 0     | 0   | 0     | 0     | 49          |
|       | RG1   | H+ HER2+ | 0          | 0   | 0           | 0   | 0   | 0     | 266         | 0   | 0   | 0     | 0           | 0   | 0     | 0   | 0     | 0     | 266         |
|       | RG2   | TN       | 0          | 0   | 0           | 0   | 0   | 0     | 0           | 140 | 0   | 0     | 0           | 0   | 0     | 0   | 0     | 0     | 140         |
|       | RG2   | H+       | 0          | 0   | 0           | 0   | 0   | 0     | 0           | 0   | 252 | 0     | 0           | 0   | 0     | 0   | 0     | 0     | 252         |
|       | RG2   | HER2+    | 0          | 0   | 0           | 0   | 0   | 0     | 0           | 0   | 0   | 104   | 0           | 0   | 0     | 0   | 0     | 0     | 104         |
|       | RG2   | H+ HER2+ | 0          | 0   | 0           | 0   | 0   | 0     | 0           | 0   | 0   | 0     | 218         | 0   | 0     | 0   | 0     | 0     | 218         |
|       | RG3   | TN       | 0          | 0   | 0           | 0   | 0   | 0     | 0           | 0   | 0   | 0     | 0           | 169 | 0     | 0   | 0     | 0     | 169         |
|       | RG3   | H+       | 0          | 0   | 0           | 0   | 0   | 0     | 0           | 0   | 0   | 0     | 0           | 0   | 282   | 0   | 0     | 0     | 282         |
|       | RG3   | HER2+    | 0          | 0   | 0           | 0   | 0   | 0     | 0           | 0   | 0   | 0     | 0           | 0   | 0     | 274 | 0     | 0     | 274         |
|       | RG3   | H+ HER2+ | 0          | 0   | 0           | 0   | 0   | 0     | 0           | 0   | 0   | 0     | 0           | 0   | 0     | 0   | 308   | 0     | 308         |
|       | Total |          |            | 81  | 336         | 35  | 153 | 699   | 49          | 266 | 140 | 252   | 104         | 218 | 169   | 282 | 274   | 308   | 3,366       |

B: Test Cases (RF, RG + Subtype)

Accuracy: 72.3% (95% CI: 70.0–74.5%)

$\kappa = 0.66$

|       |       | Prediction |    |             |     |     |     |       |             |     |    |       |             |     |    |       |             | Total |
|-------|-------|------------|----|-------------|-----|-----|-----|-------|-------------|-----|----|-------|-------------|-----|----|-------|-------------|-------|
|       |       | RG0        |    |             |     | RG1 |     |       |             | RG2 |    |       |             | RG3 |    |       |             |       |
|       |       | TN         | H+ | H+<br>HER2+ |     | TN  | H+  | HER2+ | H+<br>HER2+ | TN  | H+ | HER2+ | H+<br>HER2+ | TN  | H+ | HER2+ | H+<br>HER2+ |       |
| Truth | RG0   | TN         | 10 | 1           | 0   | 0   | 2   | 0     | 1           | 0   | 1  | 0     | 0           | 0   | 0  | 0     | 0           | 15    |
|       | RG0   | H+         | 0  | 97          | 0   | 1   | 49  | 0     | 0           | 0   | 7  | 0     | 1           | 1   | 1  | 0     | 0           | 157   |
|       | RG0   | H+ HER2+   | 0  | 0           | 0   | 0   | 0   | 0     | 0           | 0   | 0  | 0     | 0           | 0   | 0  | 0     | 0           | 0     |
|       | RG1   | TN         | 0  | 0           | 0   | 58  | 15  | 0     | 0           | 0   | 0  | 0     | 0           | 0   | 3  | 0     | 0           | 76    |
|       | RG1   | H+         | 0  | 2           | 0   | 0   | 436 | 0     | 1           | 2   | 7  | 1     | 1           | 0   | 7  | 1     | 1           | 459   |
|       | RG1   | HER2+      | 0  | 0           | 0   | 0   | 8   | 8     | 1           | 0   | 1  | 0     | 2           | 0   | 0  | 0     | 0           | 20    |
|       | RG1   | H+ HER2+   | 0  | 3           | 0   | 1   | 26  | 0     | 57          | 0   | 0  | 0     | 0           | 0   | 0  | 2     | 4           | 93    |
|       | RG2   | TN         | 0  | 1           | 0   | 0   | 27  | 0     | 2           | 47  | 0  | 0     | 0           | 0   | 3  | 4     | 5           | 89    |
|       | RG2   | H+         | 0  | 1           | 0   | 0   | 8   | 0     | 0           | 0   | 40 | 2     | 0           | 0   | 1  | 0     | 1           | 53    |
|       | RG2   | HER2+      | 0  | 4           | 0   | 0   | 14  | 0     | 1           | 0   | 5  | 33    | 0           | 1   | 0  | 2     | 11          | 71    |
|       | RG2   | H+ HER2+   | 0  | 0           | 0   | 0   | 25  | 0     | 0           | 0   | 1  | 0     | 32          | 0   | 3  | 2     | 1           | 64    |
|       | RG3   | TN         | 0  | 0           | 0   | 0   | 40  | 0     | 0           | 0   | 3  | 0     | 0           | 85  | 2  | 1     | 4           | 135   |
|       | RG3   | H+         | 0  | 1           | 0   | 0   | 31  | 0     | 0           | 0   | 1  | 0     | 0           | 0   | 33 | 0     | 3           | 69    |
|       | RG3   | HER2+      | 2  | 0           | 0   | 0   | 14  | 0     | 0           | 0   | 0  | 0     | 7           | 0   | 1  | 53    | 1           | 78    |
|       | RG3   | H+ HER2+   | 0  | 1           | 0   | 4   | 32  | 0     | 0           | 0   | 0  | 0     | 0           | 0   | 0  | 1     | 128         | 166   |
|       | Total |            |    | 12          | 111 | 0   | 64  | 727   | 8           | 63  | 49 | 66    | 36          | 43  | 87 | 54    | 66          | 159   |

Note: In the test cases, there was no case of (RG0, H+ HER2+).



**Table S7.** CNN, SVM and RF model analysis summarized into case-based results on training cases

**A: Training Cases**  
(CNN)

Accuracy: 95.2%  
(95% CI: 91.3–97.7%)  
 $\kappa = 0.93$

|       |       | Prediction |     |     |     |       |
|-------|-------|------------|-----|-----|-----|-------|
|       |       | RG0        | RG1 | RG2 | RG3 | Total |
| Truth | RG0   | 30         | 0   | 0   | 0   | 30    |
|       | RG1   | 4          | 64  | 0   | 1   | 69    |
|       | RG2   | 0          | 2   | 47  | 0   | 49    |
|       | RG3   | 1          | 2   | 0   | 56  | 59    |
|       | Total | 35         | 68  | 47  | 57  | 207   |

**B: Training Cases**  
(SVM, RG only)

Accuracy: 96.1%  
(95% CI: 92.5–98.3%)  
 $\kappa = 0.95$

|       |       | Prediction |     |     |     |       |
|-------|-------|------------|-----|-----|-----|-------|
|       |       | RG0        | RG1 | RG2 | RG3 | Total |
| Truth | RG0   | 29         | 1   | 0   | 0   | 30    |
|       | RG1   | 0          | 69  | 0   | 0   | 69    |
|       | RG2   | 0          | 3   | 44  | 2   | 49    |
|       | RG3   | 0          | 1   | 1   | 57  | 59    |
|       | Total | 29         | 74  | 45  | 59  | 207   |

**C: Training Cases**  
(SVM RG + Subtype)

Accuracy: 100%  
(95% CI: 98.2–100%)  
 $\kappa = 1.00$

|       |       | Prediction |     |     |     |       |
|-------|-------|------------|-----|-----|-----|-------|
|       |       | RG0        | RG1 | RG2 | RG3 | Total |
| Truth | RG0   | 30         | 0   | 0   | 0   | 30    |
|       | RG1   | 0          | 69  | 0   | 0   | 69    |
|       | RG2   | 0          | 0   | 49  | 0   | 49    |
|       | RG3   | 0          | 0   | 0   | 59  | 59    |
|       | Total | 30         | 69  | 49  | 59  | 207   |

**D: Training Cases**  
(RF, RG + Subtype)

Accuracy: 100%  
(95% CI: 98.2–100%)  
 $\kappa = 1.00$

Out-of-Bag (OOB) error rate: 17.76%

|       |       | Prediction |     |     |     |       |
|-------|-------|------------|-----|-----|-----|-------|
|       |       | RG0        | RG1 | RG2 | RG3 | Total |
| Truth | RG0   | 30         | 0   | 0   | 0   | 30    |
|       | RG1   | 0          | 69  | 0   | 0   | 69    |
|       | RG2   | 0          | 0   | 49  | 0   | 49    |
|       | RG3   | 0          | 0   | 0   | 59  | 59    |
|       | Total | 30         | 69  | 49  | 59  | 207   |

Note: **A.** CNN model analysis result on training cases. **B.** SVM model analysis (only RG information was used) result on training cases. **C.** SVM model analysis (RG and subtype information was used) result on training cases. **D.** Random Forest model analysis (RG and subtype information was used) result on training cases.

**Table S8.** Test case results of the pipeline system and majority voting method

| Case Information |                |           |             | CNN             |           | SVM                |            |            | RF        | Pipeline System Result | Majority Voting Result |
|------------------|----------------|-----------|-------------|-----------------|-----------|--------------------|------------|------------|-----------|------------------------|------------------------|
| Case #           | Response Grade | RCB Class | Subtype     | LH ( $\Delta$ ) | DL result | Subtype Prediction | Subtype LH | SVM result | RF result |                        |                        |
| 1                | 1              | 3         | H+          | 12.0            | 1         | H+                 | 0.61       | 1          | 1         | 1                      | 1                      |
| 2                | 0              | 2         | H+          | 19.1            | 0         | H+                 | 0.90       | 0          | 0         | 0                      | 0                      |
| 3                | 1              | 1         | H+          | 10.8            | 1         | H+                 | 0.77       | 1          | 1         | 1                      | 1                      |
| 4                | 2              | 1         | HER2+       | 1.2             | 2         | HER2+              | 0.44       | 2          | 2         | 2                      | 2                      |
| 5                | 3              | 0         | H+<br>HER2+ | 17.3            | 3         | H+<br>HER2+        | 0.34       | 3          | 3         | 3                      | 3                      |
| 6                | 1              | 2         | H+          | 9.9             | 1         | H+                 | 0.56       | 1          | 2         | 1                      | 1                      |
| 7                | 3              | 0         | HER2+       | 21.1            | 3         | HER2+              | 0.38       | 3          | 3         | 3                      | 3                      |
| 8                | 2              | 2         | TN          | 0.1             | 2         | TN                 | 0.47       | 3          | 2         | 2                      | 2                      |
| 9                | 1              | 2         | TN          | 5.4             | 3         | TN                 | 0.48       | 1          | 1         | 1                      | 1                      |
| 10               | 2              | 1         | TN          | 8.1             | 2         | TN                 | 0.73       | 2          | 2         | 2                      | 2                      |
| 11               | 1              | 2         | H+          | 5.7             | 1         | H+                 | 0.89       | 1          | 1         | 1                      | 1                      |
| 12               | 1              | 2         | H+          | 9.3             | 1         | H+                 | 0.88       | 1          | 1         | 1                      | 1                      |
| 13               | 3              | 0         | H+<br>HER2+ | 1.8             | 0         | H+                 | 0.38       | 3          | 3         | 3                      | 3                      |
| 14               | 1              | 3         | H+          | 1.3             | 1         | H+                 | 0.56       | 1          | 1         | 1                      | 1                      |
| 15               | 3              | 0         | H+<br>HER2+ | 15.9            | 3         | H+<br>HER2+        | 0.90       | 3          | 3         | 3                      | 3                      |
| 16               | 2              | 1         | H+<br>HER2+ | 12.4            | 2         | H+                 | 0.39       | 2          | 2         | 2                      | 2                      |
| 17               | 3              | 0         | TN          | 9.8             | 3         | H+                 | 0.75       | 1          | 3         | 3                      | 3                      |
| 18               | 3              | 0         | TN          | 13.9            | 3         | H+                 | 0.42       | 3          | 3         | 3                      | 3                      |
| 19               | 1              | 1         | H+          | 6.4             | 1         | H+                 | 0.50       | 1          | 1         | 1                      | 1                      |
| 20               | 2              | 2         | HER2+       | 4.1             | 2         | HER2+              | 0.48       | 2          | 2         | 2                      | 2                      |
| 21               | 3              | 0         | H+          | 19.2            | 3         | H+                 | 0.72       | 3          | 3         | 3                      | 3                      |
| 22               | 1              | 2         | TN          | 0.6             | 3         | TN                 | 0.34       | 3          | 1         | 1                      | 3                      |
| 23               | 2              | 1         | H+<br>HER2+ | 7.7             | 2         | H+                 | 0.48       | 2          | 2         | 2                      | 2                      |
| 24               | 1              | 2         | TN          | 10.8            | 1         | H+                 | 0.61       | 1          | 1         | 1                      | 1                      |
| 25               | 1              | 2         | H+          | 0.4             | 1         | H+                 | 0.82       | 3          | 1         | 3                      | 1                      |
| 26               | 3              | 0         | H+<br>HER2+ | 3.8             | 3         | H+                 | 0.47       | 3          | 3         | 3                      | 3                      |
| 27               | 2              | 2         | H+          | 8.9             | 2         | H+                 | 0.59       | 2          | 2         | 2                      | 2                      |
| 28               | 1              | 2         | H+<br>HER2+ | 6.7             | 1         | H+                 | 0.55       | 1          | 1         | 1                      | 1                      |
| 29               | 2              | 2         | HER2+       | 0.2             | 3         | H+                 | 0.50       | 1          | 2         | 2                      | Unable                 |

|    |   |   |             |      |   |             |      |   |   |   |   | to reach final result        |
|----|---|---|-------------|------|---|-------------|------|---|---|---|---|------------------------------|
| 30 | 3 | 0 | HER2+       | 13.4 | 3 | HER2+       | 0.76 | 3 | 3 | 3 | 3 | 3                            |
| 31 | 2 | 2 | TN          | 5.7  | 2 | H+          | 0.87 | 1 | 2 | 2 | 2 | 2                            |
| 32 | 3 | 0 | TN          | 12.2 | 3 | TN          | 0.90 | 3 | 3 | 3 | 3 | 3                            |
| 33 | 1 | 2 | H+<br>HER2+ | 13.7 | 1 | H+          | 0.74 | 1 | 1 | 1 | 1 | 1                            |
| 34 | 3 | 2 | TN          | 6.0  | 3 | H+          | 0.80 | 3 | 3 | 3 | 3 | 3                            |
| 35 | 0 | 3 | TN          | 5.4  | 0 | TN          | 0.52 | 0 | 0 | 0 | 0 | 0                            |
| 36 | 1 | 2 | HER2+       | 16.4 | 1 | HER2+       | 0.47 | 1 | 2 | 1 | 1 | 1                            |
| 37 | 2 | 2 | H+<br>HER2+ | 8.8  | 0 | H+          | 0.64 | 1 | 2 | 2 | 2 | Unable to reach final result |
| 38 | 0 | 3 | H+          | 17.3 | 0 | H+          | 0.69 | 0 | 0 | 0 | 0 | 0                            |
| 39 | 0 | 3 | H+          | 3.8  | 3 | H+          | 0.71 | 2 | 0 | 2 | 2 | Unable to reach final result |
| 40 | 1 | 2 | H+          | 6.3  | 1 | H+          | 0.76 | 1 | 1 | 1 | 1 | 1                            |
| 41 | 0 | 3 | H+          | 17.3 | 0 | H+          | 0.89 | 0 | 0 | 0 | 0 | 0                            |
| 42 | 3 | 0 | H+          | 5.9  | 3 | H+          | 0.81 | 3 | 3 | 3 | 3 | 3                            |
| 43 | 1 | 2 | H+<br>HER2+ | 13.7 | 1 | TN          | 0.45 | 1 | 1 | 1 | 1 | 1                            |
| 44 | 2 | 1 | H+          | 11.8 | 2 | H+          | 0.42 | 2 | 2 | 2 | 2 | 2                            |
| 45 | 3 | 0 | H+<br>HER2+ | 14.4 | 3 | HER2+       | 0.65 | 3 | 3 | 3 | 3 | 3                            |
| 46 | 0 | 3 | H+          | 9.9  | 0 | H+          | 0.83 | 0 | 0 | 0 | 0 | 0                            |
| 47 | 2 | 2 | HER2+       | 5.5  | 2 | H+<br>HER2+ | 0.60 | 3 | 3 | 3 | 3 | 3                            |
| 48 | 1 | 2 | H+          | 2.2  | 2 | H+          | 0.58 | 1 | 1 | 1 | 1 | 1                            |
| 49 | 1 | 2 | H+          | 4.6  | 1 | H+          | 0.91 | 1 | 1 | 1 | 1 | 1                            |
| 50 | 0 | 3 | H+          | 6.8  | 0 | H+<br>HER2+ | 0.66 | 3 | 1 | 1 | 1 | Unable to reach final result |
| 51 | 2 | 2 | TN          | 10.1 | 2 | TN          | 0.59 | 2 | 2 | 2 | 2 | 2                            |
| 52 | 1 | 3 | H+          | 6.6  | 3 | H+          | 0.71 | 1 | 1 | 1 | 1 | 1                            |
| 53 | 3 | 0 | TN          | 21.5 | 3 | TN          | 0.79 | 3 | 3 | 3 | 3 | 3                            |
| 54 | 2 | 2 | H+          | 11.0 | 2 | H+          | 0.60 | 2 | 2 | 2 | 2 | 2                            |
| 55 | 1 | 2 | H+          | 6.6  | 1 | H+          | 0.87 | 1 | 1 | 1 | 1 | 1                            |

|    |   |   |             |      |   |             |      |   |   |   |   |
|----|---|---|-------------|------|---|-------------|------|---|---|---|---|
| 56 | 0 | 3 | H+          | 15.0 | 0 | H+          | 0.36 | 3 | 0 | 0 | 0 |
| 57 | 1 | 2 | H+          | 9.8  | 1 | H+          | 0.65 | 1 | 1 | 1 | 1 |
| 58 | 3 | 0 | H+          | 12.1 | 3 | H+          | 0.49 | 3 | 3 | 3 | 3 |
| 59 | 1 | 2 | H+          | 5.1  | 1 | H+          | 0.81 | 1 | 1 | 1 | 1 |
| 60 | 2 | 2 | H+<br>HER2+ | 14.6 | 2 | TN          | 0.39 | 2 | 2 | 2 | 2 |
| 61 | 1 | 2 | H+<br>HER2+ | 10.3 | 1 | H+<br>HER2+ | 0.63 | 1 | 1 | 1 | 1 |
| 62 | 0 | 2 | H+          | 12.5 | 0 | H+          | 0.48 | 0 | 0 | 0 | 0 |
| 63 | 3 | 0 | HER2+       | 16.4 | 3 | HER2+       | 0.72 | 3 | 3 | 3 | 3 |
| 64 | 0 | 2 | H+          | 3.7  | 0 | H+          | 0.64 | 2 | 0 | 2 | 0 |
| 65 | 3 | 0 | HER2+       | 16.6 | 3 | HER2+       | 0.78 | 3 | 3 | 3 | 3 |
| 66 | 3 | 0 | H+<br>HER2+ | 15.4 | 3 | H+<br>HER2+ | 0.72 | 3 | 3 | 3 | 3 |
| 67 | 2 | 1 | HER2+       | 10.1 | 2 | HER2+       | 0.88 | 2 | 2 | 2 | 2 |
| 68 | 3 | 0 | TN          | 13.9 | 3 | TN          | 0.47 | 3 | 3 | 3 | 3 |
| 69 | 1 | 2 | H+          | 3.3  | 1 | H+          | 0.90 | 1 | 1 | 1 | 1 |
| 70 | 3 | 0 | H+          | 7.3  | 3 | H+          | 0.75 | 3 | 3 | 3 | 3 |
| 71 | 3 | 0 | TN          | 12.9 | 3 | TN          | 0.84 | 3 | 3 | 3 | 3 |
| 72 | 1 |   | TN          | 2.6  | 1 | TN          | 0.91 | 1 | 1 | 1 | 1 |
| 73 | 3 | 0 | H+<br>HER2+ | 14.4 | 3 | H+<br>HER2+ | 0.85 | 3 | 3 | 3 | 3 |
| 74 | 2 | 1 | TN          | 5.6  | 2 | H+          | 0.57 | 1 | 2 | 2 | 2 |
| 75 | 3 | 0 | H+<br>HER2+ | 7.7  | 3 | TN          | 0.49 | 1 | 3 | 3 | 3 |
| 76 | 2 | 2 | H+<br>HER2+ | 9.7  | 2 | H+<br>HER2+ | 0.73 | 2 | 2 | 2 | 2 |
| 77 | 1 | 2 | H+<br>HER2+ | 4.3  | 1 | H+<br>HER2+ | 0.78 | 1 | 1 | 1 | 1 |
| 78 | 1 | 2 | H+          | 14.2 | 1 | H+          | 0.89 | 1 | 1 | 1 | 1 |
| 79 | 1 | 2 | H+<br>HER2+ | 7.3  | 1 | H+<br>HER2+ | 0.39 | 1 | 1 | 1 | 1 |
| 80 | 3 | 0 | H+<br>HER2+ | 12.0 | 3 | H+<br>HER2+ | 0.80 | 3 | 3 | 3 | 3 |
| 81 | 1 | 2 | H+          | 2.0  | 3 | H+          | 0.69 | 1 | 1 | 1 | 1 |
| 82 | 3 | 0 | TN          | 8.3  | 3 | TN          | 0.75 | 3 | 3 | 3 | 3 |
| 83 | 1 | 3 | H+          | 1.9  | 1 | H+          | 0.70 | 1 | 1 | 1 | 1 |
| 84 | 1 | 3 | H+          | 6.6  | 1 | H+          | 0.53 | 1 | 1 | 1 | 1 |
| 85 | 1 | 2 | H+          | 2.5  | 3 | H+          | 0.46 | 1 | 1 | 1 | 1 |
| 86 | 3 | 0 | H+<br>HER2+ | 15.2 | 3 | H+          | 0.61 | 1 | 3 | 3 | 3 |
| 87 | 1 | 3 | H+          | 7.8  | 1 | H+          | 0.79 | 1 | 1 | 1 | 1 |

|     |   |   |             |          |   |             |      |   |   |   |   |
|-----|---|---|-------------|----------|---|-------------|------|---|---|---|---|
| 88  | 1 | 2 | H+          | 3.8      | 1 | H+          | 0.87 | 1 | 1 | 1 | 1 |
| 89  | 1 | 3 | TN          | 4.2      | 3 | TN          | 0.82 | 1 | 1 | 1 | 1 |
| 90  | 1 | 2 | HER2+       | 8.0      | 1 | HER2+       | 0.52 | 1 | 1 | 1 | 1 |
| 91  | 1 | 2 | H+          | 4.2      | 1 | H+          | 0.65 | 1 | 1 | 1 | 1 |
| 92  | 1 | 2 | H+          | 6.0      | 3 | H+          | 0.83 | 1 | 1 | 1 | 1 |
| 93  | 1 | 2 | H+          | 2.3      | 3 | H+          | 0.88 | 1 | 1 | 1 | 1 |
| 94  | 1 | 2 | H+          | 5.7      | 1 | H+          | 0.87 | 1 | 1 | 1 | 1 |
| 95  | 2 | 2 | TN          | 0.2      | 2 | TN          | 0.29 | 3 | 2 | 2 | 2 |
| 96  | 2 | 2 | HER2+       | 1.0      | 2 | H+          | 0.46 | 2 | 2 | 2 | 2 |
| 97  | 1 | 2 | H+          | 0.2      | 3 | H+          | 0.50 | 1 | 1 | 1 | 1 |
| 98  | 1 | 1 | H+          | 3.6      | 1 | H+          | 0.87 | 1 | 1 | 1 | 1 |
| 99  | 3 | 0 | H+<br>HER2+ | 7.4      | 3 | H+<br>HER2+ | 0.73 | 3 | 3 | 3 | 3 |
| 100 | 1 | 2 | TN          | 4.8      | 1 | TN          | 0.71 | 1 | 1 | 1 | 1 |
| 101 | 2 | 2 | H+          | 7.3      | 2 | H+          | 0.80 | 2 | 2 | 2 | 2 |
| 102 | 3 | 1 | HER2+       | 15.<br>2 | 3 | HER2+       | 0.54 | 3 | 3 | 3 | 3 |
| 103 | 1 | 2 | H+          | 8.7      | 1 | H+          | 0.72 | 1 | 1 | 1 | 1 |

Note: Yellow fill shows the discrepant cases.

**Table S9.** Detailed analysis results of CNN heat map example cases

| Case information |                | ROI count |       |       |       | Likelihood |        |        |        |
|------------------|----------------|-----------|-------|-------|-------|------------|--------|--------|--------|
| Case #           | Response Grade | RG0       | RG1   | RG2   | RG3   | RG0        | RG1    | RG2    | RG3    |
| 62               | 0              | 2,646     | 31    | 107   | 272   | 16.921     | 0.000  | 4.401  | 4.350  |
| 12               | 1              | 36        | 1,860 | 107   | 314   | 0.000      | 15.655 | 2.898  | 6.329  |
| 10               | 2              | 6         | 360   | 1,511 | 331   | 0.000      | 8.936  | 17.123 | 8.982  |
| 15               | 3              | 3         | 22    | 30    | 2,468 | 0.000      | 7.856  | 8.164  | 24.058 |

**Table S10.** Detailed analysis results of SVM heat map example cases

| Case information |                | ROI count |     |     |     | Likelihood |      |      |      |
|------------------|----------------|-----------|-----|-----|-----|------------|------|------|------|
| Case #           | Response Grade | RG0       | RG1 | RG2 | RG3 | RG0        | RG1  | RG2  | RG3  |
| 41               | 0              | 14        | 0   | 0   | 1   | 0.48       | 0.23 | 0.19 | 0.10 |
| 83               | 1              | 2         | 22  | 2   | 0   | 0.03       | 0.72 | 0.05 | 0.20 |
| 10               | 2              | 3         | 0   | 18  | 0   | 0.01       | 0.13 | 0.82 | 0.03 |
| 65               | 3              | 1         | 3   | 0   | 14  | 0.07       | 0.11 | 0.04 | 0.78 |
